# Supplementary material for: Omicron BA.1 breakthrough infection drives cross-variant neutralization and memory B cell formation against conserved epitopes
Source: PubMed Central journal article supplement (PMC9162083; doi:10.1126/sciimmunol.abq2427), 2022-06-02
Supplement: sciimmunol.abq2427_sm.pdf [file sciimmunol.abq2427_sm.pdf]

Supplementary Materials for

**Omicron BA.1 breakthrough infection drives cross-variant neutralization and memory B cell formation against conserved epitopes**

Jasmin Quandt *et al.*

Corresponding author: Ugur Sahin, Ugur.Sahin@biontech.de

DOI: 10.1126/sciimmunol.abq2427

**The PDF file includes:**

Figs. S1 to S7  
Tables S1 to S13

**Other Supplementary Material for this manuscript includes the following:**

MDAR Reproducibility Checklist

# **Omicron BA.1 breakthrough infection drives cross-variant neutralization and memory B cell formation against conserved epitopes**

Jasmin Quandt, Alexander Muik, Nadine Salisch, Bonny Gaby Lui, Sebastian Lutz, Kimberly Krüger, Ann-Kathrin Wallisch, Petra Adams-Quack, Maren Bacher, Andrew Finlayson, Orkun Ozhelvaci, Isabel Vogler, Katharina Grikscheit, Sebastian Hoehl, Udo Goetsch, Sandra Ciesek, Özlem Türeci, Ugur Sahin

Correspondence to: [Ugur.Sahin@biontech.de](mailto:Ugur.Sahin@biontech.de)

## **Supplementary Materials:**

Figs. S1-S7

Tables S1-S13

Reproducibility Checklist

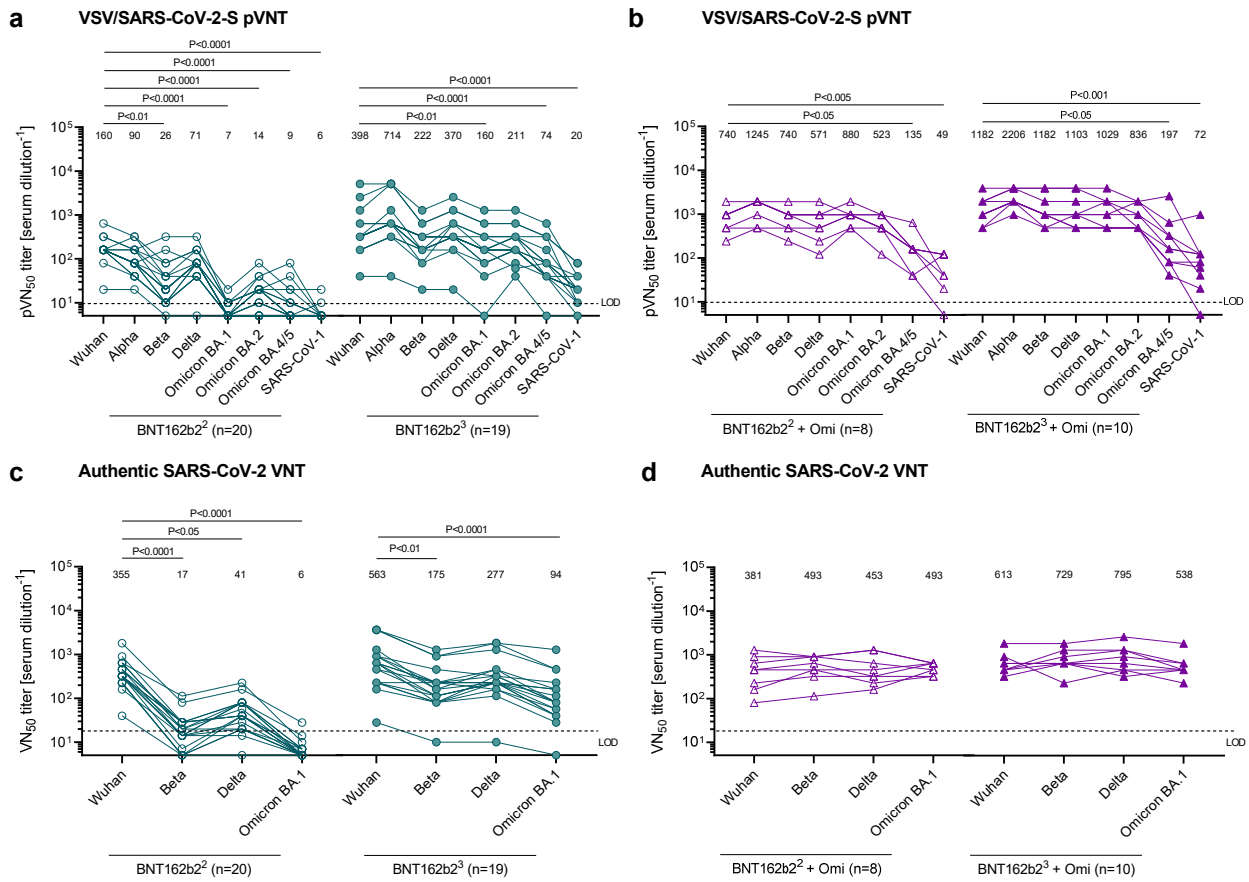

**Fig. S1. Individually plotted 50% pseudovirus and live SARS-CoV-2 virus neutralization titers (pVN<sub>50</sub> and VN<sub>50</sub>) against SARS-CoV-2 Wuhan, variants of concern (VOCs) and SARS-CoV-1.**

Individual line plots from the dataset shown in Fig. 2a, b. pVN<sub>50</sub> GMTs against Wuhan, VOC and SARS-CoV-1 pseudovirus are shown for (a) Omicron-naïve individuals double- (BNT162b2<sup>2</sup>: green, open circles) and triple-vaccinated with BNT162b2 (BNT162b2<sup>3</sup>: green, closed circles), and (b) Omicron BA.1 breakthrough infected individuals double- (BNT162b2<sup>2</sup> + Omi: purple, open triangles) and triple-vaccinated with BNT162b2 (BNT162b2<sup>3</sup> + Omi: purple, closed triangles) prior to infection. VN<sub>50</sub> GMTs against Wuhan and VOC are shown for (c) Omicron-naïve individuals double- (BNT162b2<sup>2</sup>: green, open circles) and triple-vaccinated with

BNT162b2 (BNT162b2<sup>3</sup>: green, closed circles), and **(d)** Omicron BA.1 breakthrough infected individuals double- (BNT162b2<sup>2</sup> + Omi: purple, open triangles) and triple-vaccinated with BNT162b2 (BNT162b2<sup>3</sup> + Omi: purple, closed triangles) prior to infection. Serum was tested in duplicate. For titer values below the limit of detection (LOD), LOD/2 values were plotted. Values above line plots represent group GMTs. The nonparametric Friedman test with Dunn's multiple comparisons correction was used to compare Wuhan neutralizing group GMTs with titers against the indicated variants and SARS-CoV-1. Multiplicity-adjusted p values are shown.

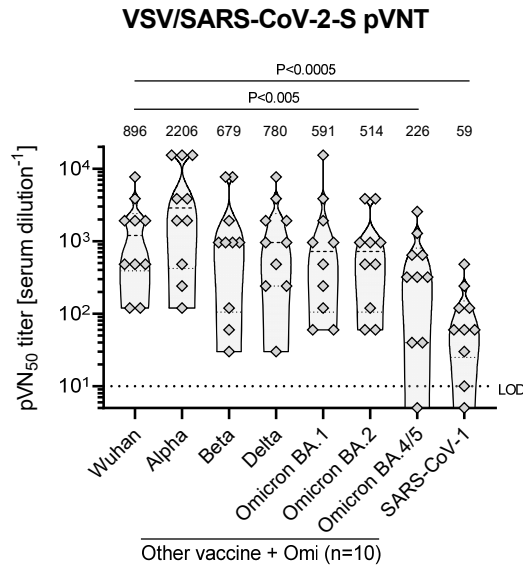

**Fig. S2. Omicron BA.1 breakthrough infection of individuals vaccinated with other approved COVID-19 vaccines or mixed regimens results in immune sera that broadly neutralize Omicron BA.1, BA.2 and other VOCs, but not BA.4 and BA.5.**

Serum was drawn from 10 individuals vaccinated with other approved COVID-19 vaccines or mixed regimens at a median 43 days after infection (grey diamonds). Serum was tested in duplicate; individual 50% pseudovirus neutralization (pVN50) geometric mean titers (GMTs) against SARS-CoV-2 Wuhan, Alpha, Beta, Delta and Omicron BA.1, BA.2 and BA.4/5 variants, plus SARS-CoV-1 were plotted. For titer values below the limit of detection (LOD), LOD/2 values were plotted. Values above violin plots represent group GMTs. The nonparametric Friedman test with Dunn's multiple comparisons correction was used to compare Wuhan neutralizing group GMTs with titers against the indicated variants and SARS-CoV-1. Multiplicity-adjusted p values are shown.

**Fig. S3**

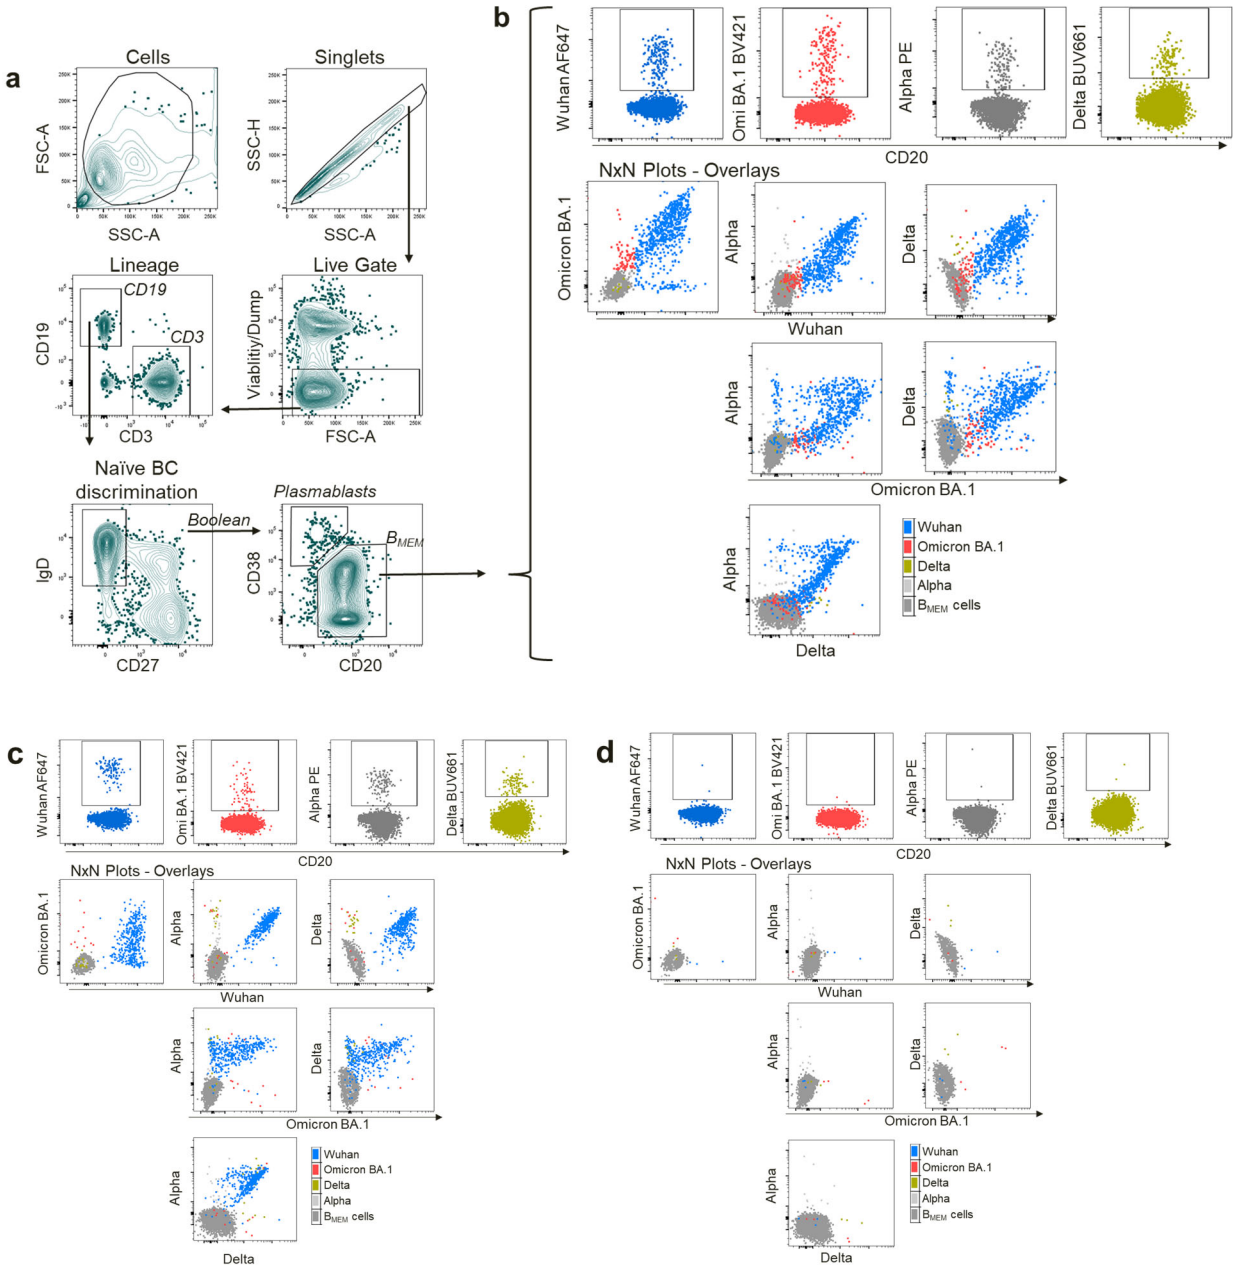

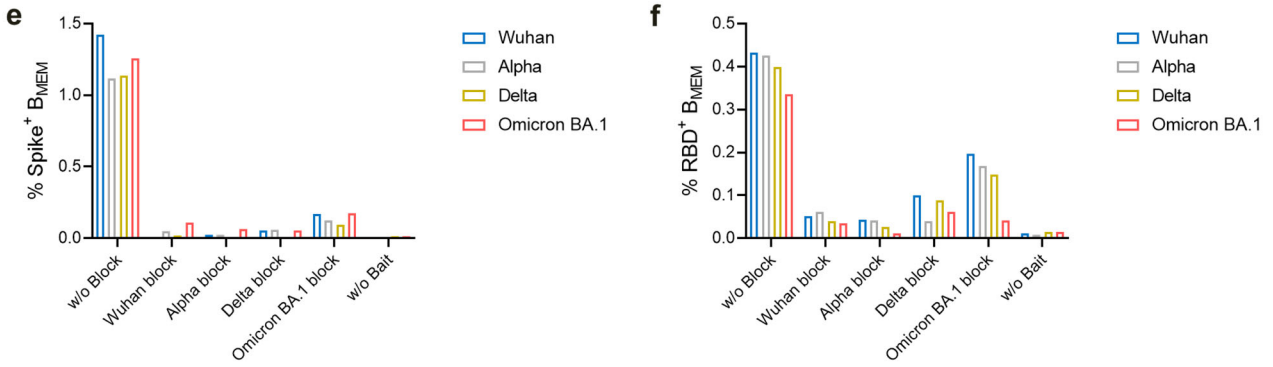

**Fig. S3. Flow cytometric gating strategy for B cell phenotypic analysis and assay controls.**

Representative flow plots of a triple BNT162b2 vaccinated and Omicron BA.1 convalescent subject analyzed for binding of full-length SARS-COV-2 Wuhan spike (S) glycoprotein and its variants (also referred to as B-cell baits). **(a)** Debris and doublets were discriminated via forward scatter (FSC)/side scatter (SSC). Dead cells and monocytes (CD14, CD16 – Viability/Dump channel) were then excluded. CD19 positive B cells were analyzed for IgD and CD27 expression: thereby, naïve B cells were discriminated as IgD<sup>+</sup> cells with the Boolean ‘make non-gate’ function. Within non-naïve B cells, plasmablasts (CD38<sup>high</sup> CD20<sup>low</sup>) and memory B cells (B<sub>MEMS</sub> CD38<sup>int/low</sup>CD20<sup>high</sup>) were distinguished. **(b)** B<sub>MEM</sub> were analyzed for B-cell bait binding. SARS-CoV-2 S reactivities were assessed by gating on each S/RBD variant tested by plotting against the CD20 signal. Bait gates were overlaid onto total B<sub>MEM</sub> cells and displayed as NxN-plots for the four bait channels. **(c)** The same analysis is shown for a sample from the same donor stained with Wuhan RBD and the other three variants tested as well as **(d)** the negative staining control stained with the four different streptavidin-fluorophore conjugates (StrepAV-BV421, StrepAV-BUV661, StrepAV-AF647, StrepAV-PE) used for tetramerization without addition of the bait proteins. To further ensure specific binding, samples from a BNT162b2-vaccinated subject were pre-incubated with non-labeled S glycoprotein **(e)** and RBD **(f)** prior to bait

staining. This shows that pre-incubation with non-labeled S glycoprotein and RBD prevents fluorescently labeled bait proteins from binding.



**Fig. S4**

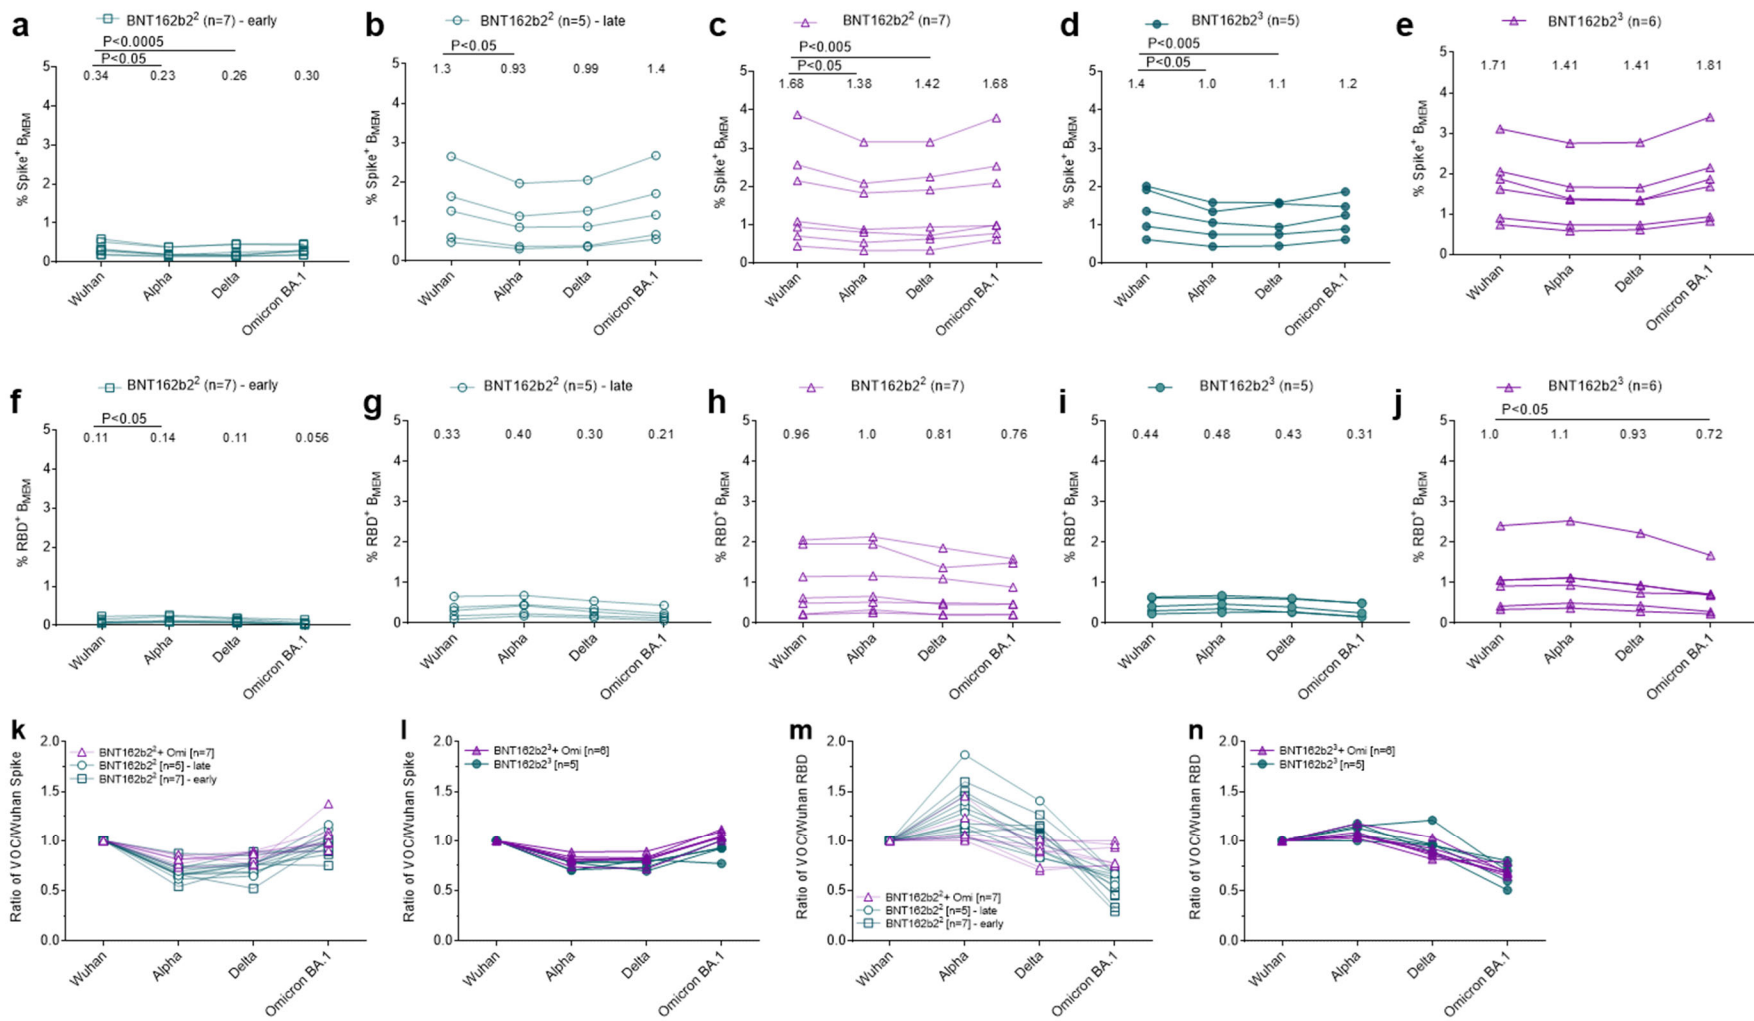

**Fig. S4. Omicron BA.1 breakthrough infection of BNT162b2 double- and of triple-vaccinated individuals primarily boosts  $B_{MEM}$  against conserved epitopes shared broadly between S proteins of Wuhan and other VOCs rather than strictly Omicron BA.1 spike-specific epitopes.**

PBMC samples from double (BNT162b2<sup>2</sup>) and triple (BNT162b2<sup>3</sup>) BNT162b2 vaccinated individuals who did (green) or did not (purple) experience an Omicron BA.1 breakthrough infection (+Omi) were analyzed via flow cytometry for antigen-specific memory B cell ( $B_{MEM} - CD3^-CD19^+CD20^+IgD^-CD38^{int/low}$ ) frequencies via B-cell bait staining. Frequencies of Wuhan, Alpha, Delta, and Omicron BA.1 S glycoprotein specific  $B_{MEM}$  (**a-e**), and Wuhan and variants RBD-specific  $B_{MEM}$  cells (**f-j**) for the five different groups of individuals are shown. Each line represents one individual donor. Variant-specific  $B_{MEM}$  frequencies were normalized to Wuhan frequencies for full-length S (**k, l**) and RBD (**m, n**) binding for Omicron-naïve and -experienced individuals that received two doses of BNT162b2 (**k, m**) and triple-dosed individuals (**l, n**). Each line represents one individual donor. Mean values are indicated. n = number of individuals per group. The nonparametric Friedman test with Dunn's multiple comparisons correction was used to compare frequencies of Wuhan S- and RBD-specific  $B_{MEM}$  cells to the variants. VOC, variant of concern; FLS, full-length S glycoprotein.

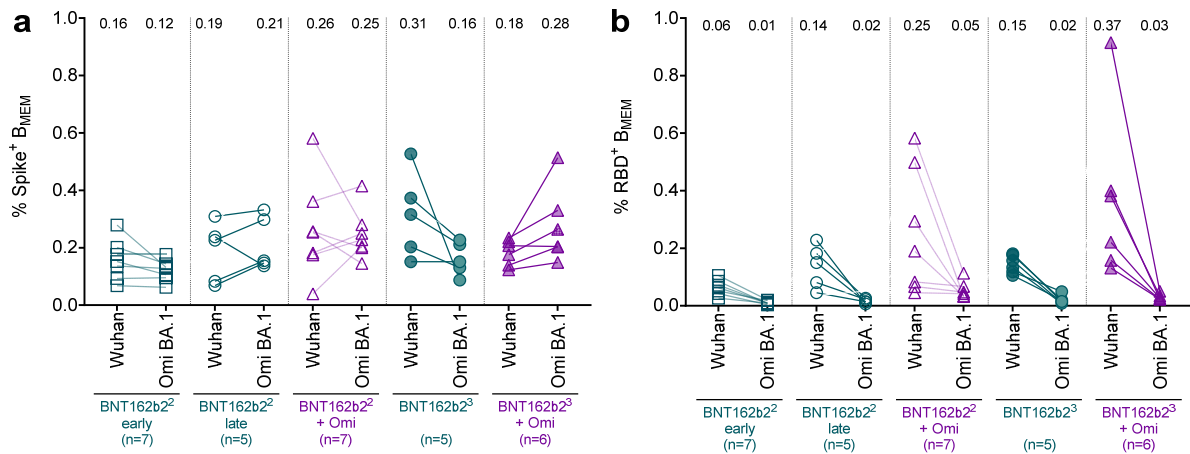

**Fig. S5. Omicron BA.1 breakthrough infection of BNT162b2 double- and triple-vaccinated individuals primarily boosts  $B_{MEM}$  against conserved epitopes shared broadly between S glycoproteins of Wuhan and other VOCs rather than strictly Omicron BA.1 S-specific epitopes.**

PBMC samples from double-vaccinated individuals (BNT162b2<sup>2</sup>) at 22 days after the second dose (green, open squares) and 5 months after the second dose (green, open circles), from triple-vaccinated individuals (BNT162b2<sup>3</sup>) at 84 days after the third dose (green, closed circles), from double-vaccinated individuals with Omicron BA.1 breakthrough infection (BNT162b2<sup>2</sup> + Omi) at 46 days post-infection (purple, open triangles), and from triple-vaccinated individuals with Omicron BA.1 breakthrough infection (BNT162b2<sup>3</sup> + Omi) at 44 days post-infection (purple, closed triangle) were analyzed via flow cytometry for SARS-CoV-2-specific memory B cell ( $B_{MEM} = CD3^-CD19^+CD20^+IgD^-CD38^{int/low}$ ) frequencies via B-cell bait staining. Frequencies of  $B_{MEM}$ -binding Omicron BA.1 and Wuhan full-length S glycoprotein (**a**) or RBD (**b**) for Omicron BA.1-experienced and naïve BNT162b2 double and triple vaccinees are shown. Mean values are indicated. n = number of individuals per group.

RBD  
Wuhan WT strain  
VOD ALPHA  
VOC DELTA  
VOC OMICRON BA.1  
VOC OMICRON BA.4/5

301 CTLKSFTVEKGIYQTSNFRVQPTESI**V**RFPNITNLCPFGEVFNATRFASV  
301 CTLKSFTVEKGIYQTSNFRVQPTESI**V**RFPNITNLCPFGEVFNATRFASV  
301 CTLKSFTVEKGIYQTSNFRVQPTESI**V**RFPNITNLCPFGEVFNATRFASV  
301 CTLKSFTVEKGIYQTSNFRVQPTESI**V**RFPNITNLCPF**D**EVFNATRFASV  
301 CTLKSFTVEKGIYQTSNFRVQPTESI**V**RFPNITNLCPF**D**EVFNATRFASV

351 YAWNRRKISNCVADYSVLYNSAS**F**STFKCYGVSPTKLNLDLCTNVYADSE  
351 YAWNRRKISNCVADYSVLYNSAS**F**STFKCYGVSPTKLNLDLCTNVYADSE  
351 YAWNRRKISNCVADYSVLYNSAS**F**STFKCYGVSPTKLNLDLCTNVYADSE  
351 YAWNRRKISNCVADYSVLYN**L****A****P****F****F**TFKCYGVSPTKLNLDLCTNVYADSE  
351 YAWNRRKISNCVADYSVLYN**F****A****P****F****F**A**F**FKCYGVSPTKLNLDLCTNVYADSE

401 VIRGDEVRQIAPGQTGKIADYNYKLPDDFTGCVIAWNSNNLDSKVGGNYN  
401 VIRGDEVRQIAPGQTGKIADYNYKLPDDFTGCVIAWNSNNLDSKVGGNYN  
401 VIRGDEVRQIAPGQTGKIADYNYKLPDDFTGCVIAWNSNNLDSKVGGNYN  
401 VIRGDEVRQIAPGQT**G**NIADYNYKLPDDFTGCVIAWNS**N**KLDSKVS**G**GNYN  
401 VIR**G**NE**V**S**Q**IAPGQT**G**NIADYNYKLPDDFTGCVIAWNS**N**KLDSKVGGNYN

451 YLYR**L**FRK**S**NLKPFFERDISTEIIY**Q**AG**S**T**P**NGVEGFNCYFPLQSYGFQPT  
451 YLYR**L**FRK**S**NLKPFFERDISTEIIY**Q**AG**S**T**P**NGVEGFNCYFPLQSYGFQPT  
451 Y**R**YR**L**FRK**S**NLKPFFERDISTEIIY**Q**AG**S****K****P**NGVEGFNCYFPLQSYGFQPT  
451 YLYR**L**FRK**S**NLKPFFERDISTEIIY**Q**AG**N****K****P**NGV**A**GFNCYFPL**R**S**S****F**R**P**T  
451 Y**R**YR**L**FRK**S**NLKPFFERDISTEIIY**Q**AG**N****K****P**NGV**A****G**VNCYFPLQSYGF**R****P**T

501 NGVGYQPYRVVLSFELLHAPATVCGPKKSTNLVKNKCVNFNFNGLTGTG  
501 Y**G**VGYQPYRVVLSFELLHAPATVCGPKKSTNLVKNKCVNFNFNGLTGTG  
501 NGVGYQPYRVVLSFELLHAPATVCGPKKSTNLVKNKCVNFNFNGLTGTG  
501 Y**G**V**G**H**Q**PYRVVLSFELLHAPATVCGPKKSTNLVKNKCVNFNFNGL**K**GTG  
501 Y**G**V**G**H**Q**PYRVVLSFELLHAPATVCGPKKSTNLVKNKCVNFNFNGLTGTG

**Fig. S6. Sequences of Wuhan and variants RBDs.**

Variant-specific amino acid alterations are indicated in bold red font, with the original Wuhan amino acid highlighted in bold blue font.

Fig. S7

a

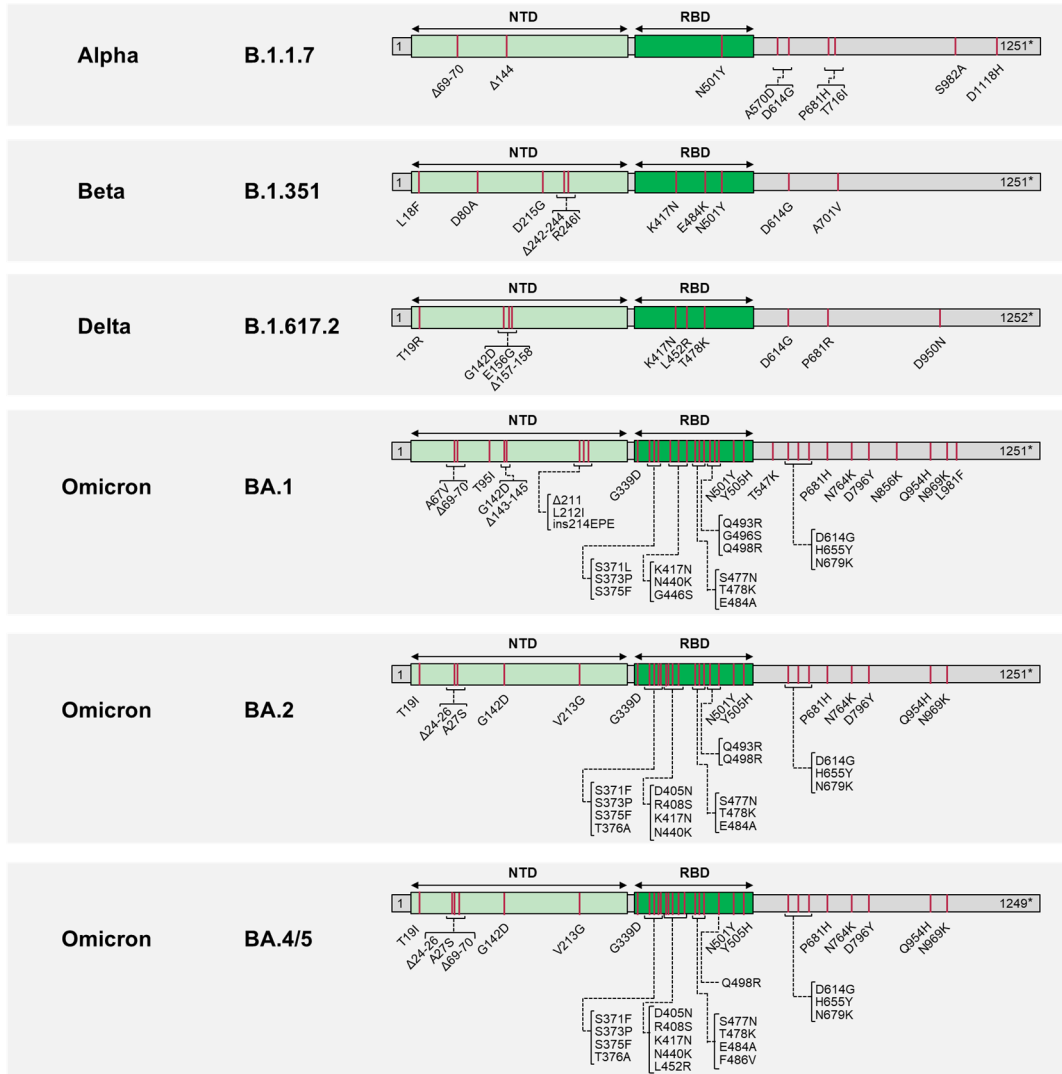

b

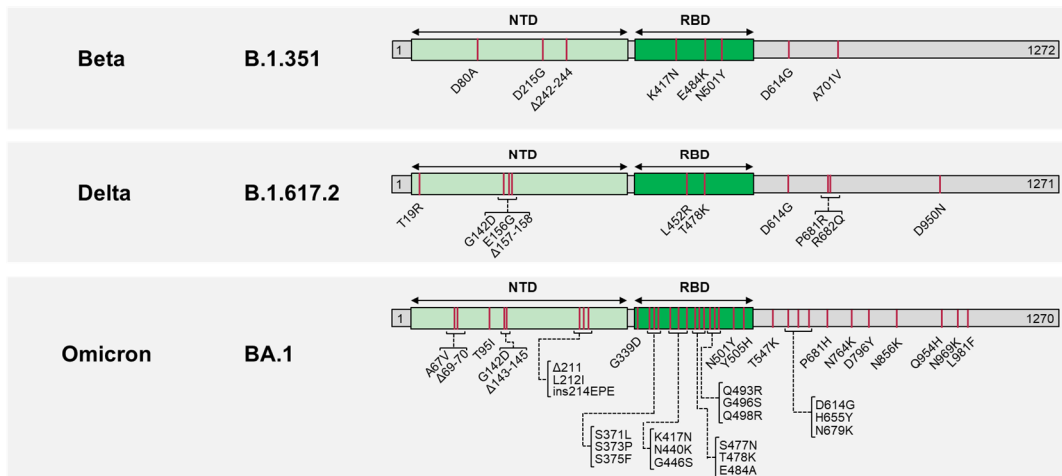

**Fig. S7. Characteristics of SARS-CoV-2 S glycoproteins used in the assays based on (a) VSV-SARS-CoV-2 variant pseudoviruses and (b) live authentic SARS-CoV-2.**

The sequence of the Wuhan-Hu-1 isolate SARS-CoV-2 S glycoprotein (GenBank: QHD43416.1) was used as reference. Amino acid positions, amino acid descriptions (one letter code) and kind of mutations (substitutions, deletions, insertions) are indicated. NTD, N-terminal domain; RBD, receptor-binding domain;  $\Delta$ , deletion; ins, insertion; \*, cytoplasmic domain truncated for the C-terminal 19 amino acids.

**Table S1. BNT162b2 vaccinated individuals analyzed for neutralizing antibody responses.**

| <b>Characteristic</b>                 | <b>BNT162b2<sup>2</sup><br/>(n=20)</b> | <b>BNT162b2<sup>3</sup><br/>(n=19)</b> | <b>BNT162b2<sup>2</sup><br/>+ Omi<br/>(n=8)</b> | <b>BNT162b2<sup>3</sup><br/>+ Omi<br/>(n=10)</b> |
|---------------------------------------|----------------------------------------|----------------------------------------|-------------------------------------------------|--------------------------------------------------|
| Sex, n (%)                            |                                        |                                        |                                                 |                                                  |
| Male                                  | 10 (50)                                | 10 (53)                                | 3 (38)                                          | 7 (70)                                           |
| Female                                | 10 (50)                                | 9 (47)                                 | 5 (62)                                          | 3 (30)                                           |
| Age, median (range)                   | 52 (23-68)                             | 38 (23-54)                             | 39 (27-60) <sup>°</sup>                         | 32 (23-60) <sup>°</sup>                          |
| Age group at vaccination, n (%)       |                                        |                                        |                                                 |                                                  |
| 18-55 yrs                             | 12 (60)                                | 19 (100)                               | 6 (75)                                          | 9 (90)                                           |
| 56-85 yrs                             | 8 (40)                                 | 0 (0)                                  | 2 (25)                                          | 1 (10)                                           |
| Baseline SARS-CoV-2 status, n (%)     |                                        |                                        |                                                 |                                                  |
| Positive                              | 0 (0)                                  | 0 (0)                                  | 8 (100) <sup>†</sup>                            | 10 (100) <sup>†</sup>                            |
| Negative                              | 20 (100) <sup>*</sup>                  | 19 (100) <sup>#</sup>                  | 0 (0)                                           | 0 (0)                                            |
| Unknown                               | 0 (0)                                  | 0 (0)                                  | 0 (0)                                           | 0 (0)                                            |
| Interval, median (range)              |                                        |                                        |                                                 |                                                  |
| Days between D1/D2                    | 20 (19-21)                             | ‡                                      | 40 (21-49)                                      | 38 (20-92)                                       |
| Days until serum draw after D2        | 22 (20-23)                             | N/A                                    | N/A                                             | n/a                                              |
| Days between D2/D3                    | N/A                                    | 202 (181-266)                          | N/A                                             | 192 (159-243)                                    |
| Days until serum draw after D3        | N/A                                    | 28 (26-30)                             | N/A                                             | N/A                                              |
| Days between last dose/infection      | N/A                                    | N/A                                    | 153 (142-182)                                   | 31 (3-112)                                       |
| Days until serum draw after infection | N/A                                    | N/A                                    | 46 (41-54)                                      | 44 (25-55)                                       |

N/A: not applicable; n/a, not available; D, Dose; Yrs, Years; n, Number.

<sup>\*</sup>, Negative SARS-CoV-2 PCR test at the time of enrollment

<sup>#</sup>, No evidence of prior SARS-CoV-2 infection (based on COVID-19 symptoms/signs and SARS-CoV-2 PCR test)

<sup>°</sup>, Age is estimated based on the indicated year of birth in Table S1

<sup>‡</sup>, Participants received the primary 2-dose series of BNT162b2 vaccine as part of a governmental vaccination program and the interval between doses was not recorded

<sup>†</sup>, Omicron BA.1 infection confirmed at time of recruitment to the research study

**Table S2. BNT162b2 vaccinated individuals analyzed for frequencies of full S glycoprotein/RBD-specific B<sub>MEM</sub> cells.**

| <b>Characteristic</b>                         | <b>BNT162b2<sup>2</sup><br/>(n=7)</b> | <b>BNT162b2<sup>3</sup><br/>(n=5)</b> | <b>BNT162b2<sup>2</sup><br/>+ Omi<br/>(n=7)</b> | <b>BNT162b2<sup>3</sup><br/>+ Omi<br/>(n=5)</b> |
|-----------------------------------------------|---------------------------------------|---------------------------------------|-------------------------------------------------|-------------------------------------------------|
| <b>Overlap with pVNT/<br/>VNT cohorts (n)</b> | <b>n=4</b>                            | <b>n=0</b>                            | <b>n=7</b>                                      | <b>n=5</b>                                      |
| Sex, n (%)                                    |                                       |                                       |                                                 |                                                 |
| Male                                          | 4 (57)                                | 4 (80)                                | 3 (43)                                          | 4 (80)                                          |
| Female                                        | 3 (43)                                | 1 (20)                                | 4 (57)                                          | 1 (20)                                          |
| Age, median (range)                           | 51 (23-80)                            | 26 (20-69)                            | 42 (29-60) <sup>o</sup>                         | 29 (23-55) <sup>o</sup>                         |
| Age group at<br>vaccination, n (%)            |                                       |                                       |                                                 |                                                 |
| 18-55 yrs                                     | 5 (71)                                | 3 (60)                                | 5 (71)                                          | 5 (100)                                         |
| 56-85 yrs                                     | 2 (29)                                | 2 (40)                                | 2 (29)                                          | 0 (0)                                           |
| Baseline SARS-CoV-<br>2 status, n (%)         |                                       |                                       |                                                 |                                                 |
| Positive                                      | 0 (0)                                 | 0 (0)                                 | 7 (100) <sup>†</sup>                            | 5 (100) <sup>†</sup>                            |
| Negative                                      | 7 (100) <sup>*</sup>                  | 5 (100) <sup>#</sup>                  | 0 (0)                                           | 0 (0)                                           |
| Unknown                                       | 0 (0)                                 | 0 (0)                                 | 0 (0)                                           | 0 (0)                                           |
| Interval, median<br>(range)                   |                                       |                                       |                                                 |                                                 |
| Days between<br>D1/D2                         | 21 (19-23)                            | 21 (19-23)                            | 42 (21-49)                                      | 36 (28-42)                                      |
| Days until early<br>blood draw<br>after D2    | 22 (19-23)                            | N/A                                   | N/A                                             | N/A                                             |
| Days until late<br>blood draw<br>after D2     | 162 (160-167)                         | N/A                                   | N/A                                             | N/A                                             |
| Days between<br>D2/D3                         | N/A                                   | 251 (180-276)                         | N/A                                             | 189 (159-255)                                   |
| Days until blood<br>draw after D3             | N/A                                   | 84 (81-86)                            | N/A                                             | N/A                                             |
| Days between last<br>dose/infection           | N/A                                   | N/A                                   | 155 (142-182)                                   | 10 (3-27)                                       |
| Days until blood<br>draw after infection      | N/A                                   | N/A                                   | 46 (41-54)                                      | 44 (43-47)                                      |

N/A, not applicable; D, Dose; Yrs, Years; n, Number.



\* , Negative SARS-CoV-2 PCR test at the time of enrollment

# , No evidence of prior SARS-CoV-2 infection (based on COVID-19 symptoms/signs and SARS-CoV-2 PCR test)

° , Age is estimated based on the indicated year of birth in Table S1

† , Omicron BA.1 infection confirmed at time of recruitment to the research study

**Table S3. Double and triple BNT162b2-vaccinated individuals with Omicron breakthrough infection.**

| Participant ID | YOB  | Sex | Vaccination BNT162b2 | Omicron subtype | Dose 1-2 interval | Dose 2-3 interval | Positive test after last vaccination | Blood draw after positive test | Severity (WHO grade) |
|----------------|------|-----|----------------------|-----------------|-------------------|-------------------|--------------------------------------|--------------------------------|----------------------|
| 1              | 1991 | f   | 2 doses              | n/a             | 42                | N/A               | 170                                  | 46                             | 1-2                  |
| 2              | 1987 | m   | 2 doses              | BA.1            | 21                | N/A               | 143                                  | 51                             | 1-2                  |
| 3              | 1995 | f   | 2 doses              | BA.1            | 33                | N/A               | 151                                  | 52                             | 1-2                  |
| 4              | 1977 | m   | 2 doses              | BA.1            | 42                | N/A               | 142                                  | 43                             | 1-2                  |
| 5              | 1966 | f   | 2 doses              | BA.1            | 38                | N/A               | 169                                  | 54                             | 1-2                  |
| 6              | 1993 | f   | 2 doses              | n/a             | 42                | N/A               | 182                                  | 41                             | 1-2                  |
| 7              | 1962 | f   | 2 doses              | n/a             | 35                | N/A               | 155                                  | 41                             | 1-2                  |
| 8              | 1980 | m   | 2 doses              | n/a             | 49                | N/A               | 148                                  | 46                             | 1-2                  |
| 9              | 1990 | f   | 3 doses              | n/a             | 24                | 243               | 64                                   | 55                             | 1-2                  |
| 10             | 1990 | m   | 3 doses              | n/a             | 20                | 233               | 66                                   | 53                             | 1-2                  |
| 11             | 1994 | m   | 3 doses              | n/a             | 35                | 213               | 10                                   | 47                             | 1-2                  |
| 12             | 1993 | f   | 3 doses              | BA.1            | 36                | 189               | 3                                    | 46                             | 1-2                  |
| 13             | 1999 | m   | 3 doses              | n/a             | 42                | 159               | 27                                   | 44                             | 1-2                  |
| 14             | 1991 | m   | 3 doses              | n/a             | 42                | 166               | 20                                   | 43                             | 1-2                  |
| 15             | 1969 | m   | 3 doses              | n/a             | 39                | 194               | 22                                   | 25                             | 1-2                  |
| 16             | 1972 | f   | 3 doses              | n/a             | 92                | 169               | 35                                   | 28                             | 1-2                  |
| 17             | 1972 | m   | 3 doses              | n/a             | 42                | 169               | 44                                   | 31                             | 1-2                  |
| 18             | 1962 | m   | 3 doses              | n/a             | 26                | 236               | 112                                  | 43                             | 1-2                  |
| <b>Median</b>  |      |     |                      |                 |                   |                   | 65                                   | 45                             |                      |

YOB, year of birth; m, male; f, female; n/a, not available; N/A, not applicable;

**Table S4. pVN<sub>50</sub> values of sera collected from Omicron-naïve double BNT162b2-vaccinated individuals.**

| Clinical trial | Participant ID | pVN <sub>50</sub> |       |      |       |              |              |                |            |
|----------------|----------------|-------------------|-------|------|-------|--------------|--------------|----------------|------------|
|                |                | Wuhan             | Alpha | Beta | Delta | Omicron BA.1 | Omicron BA.2 | Omicron BA.4/5 | SARS-CoV-1 |
| BNT162-01      | 19             | 160               | 40    | 10   | 40    | 5            | 5            | 5              | 5          |
|                | 20             | 320               | n/a   | n/a  | n/a   | 5            | n/a          | n/a            | n/a        |
|                | 21             | 80                | n/a   | n/a  | 80    | 5            | n/a          | 5              | n/a        |
|                | 22             | 160               | 160   | 40   | 80    | 10           | 20           | 20             | 5          |
|                | 23             | 320               | 160   | 320  | 320   | 10           | 40           | 80             | 5          |
|                | 24             | 160               | 80    | 20   | 80    | 5            | 10           | 5              | 5          |
|                | 25             | 160               | 80    | 20   | 80    | 5            | 10           | 5              | 10         |
|                | 26             | 320               | 160   | 80   | 160   | 20           | 80           | 20             | 20         |
|                | 27             | 160               | 80    | 40   | 40    | 5            | 40           | 10             | 5          |
|                | 28             | 160               | 80    | 20   | 80    | 10           | 20           | 5              | 5          |
|                | 29             | 160               | 40    | 10   | 80    | 5            | 5            | 5              | 5          |
|                | 30             | 160               | 80    | 10   | 40    | 5            | 10           | 5              | 5          |
|                | 31             | 160               | 80    | 160  | 80    | 5            | 20           | 40             | 5          |
|                | 32             | 80                | 40    | 10   | 40    | 5            | 5            | 5              | 5          |
|                | 33             | 160               | 160   | 20   | 80    | 5            | 20           | 10             | 5          |
|                | 34             | 640               | 320   | 40   | 160   | 10           | 20           | 5              | 5          |
|                | 35             | 160               | 320   | 80   | 160   | 10           | 20           | 5              | 5          |
|                | 36             | 160               | 80    | 20   | 80    | 5            | 20           | 10             | 5          |
| 37             | 20             | 20                | 5     | 5    | 5     | 5            | 5            | 5              |            |
| 38             | 160            | 80                | 10    | 80   | 5     | 5            | 5            | 5              |            |

n/a, not available due to lack of serum.

**Table S5. pVN<sub>50</sub> values of sera collected from Omicron-naïve triple BNT162b2-vaccinated individuals.**

| Clinical trial | Participant ID | pVN <sub>50</sub> |       |      |       |              |              |                |            |
|----------------|----------------|-------------------|-------|------|-------|--------------|--------------|----------------|------------|
|                |                | Wuhan             | Alpha | Beta | Delta | Omicron BA.1 | Omicron BA.2 | Omicron BA.4/5 | SARS-CoV-1 |
| BNT162-17      | 39             | 160               | 320   | 160  | 160   | 80           | 160          | 40             | 5          |
|                | 40             | 320               | 640   | 320  | 640   | 320          | 320          | 320            | 10         |
|                | 41             | 640               | 640   | 320  | 320   | 160          | 320          | 40             | 40         |
|                | 42             | 5120              | 5120  | 1280 | 2560  | 1280         | 1280         | 640            | 40         |
|                | 43             | 320               | 640   | 160  | 320   | 160          | 160          | 40             | 20         |
|                | 44             | 640               | 640   | 80   | 640   | 320          | 160          | 40             | 20         |
|                | 45             | 320               | 640   | 160  | 320   | 160          | 160          | 40             | 10         |
|                | 46             | 320               | 640   | 320  | 320   | 160          | 160          | 80             | 10         |
|                | 47             | 320               | 640   | 320  | 320   | 160          | 160          | 80             | 20         |
|                | 48             | 160               | 320   | 80   | 160   | 40           | 80           | 40             | 20         |
|                | 49             | 320               | 1280  | 160  | 320   | 160          | 60           | 80             | 20         |
|                | 50             | 1280              | 5120  | 640  | 1280  | 640          | 640          | 320            | 80         |
|                | 51             | 40                | 40    | 20   | 20    | 5            | 40           | 5              | 5          |
|                | 52             | 320               | 640   | 320  | 320   | 80           | 160          | 40             | 20         |
|                | 53             | 160               | 320   | 160  | 320   | 80           | 160          | 40             | 20         |
|                | 54             | 320               | 640   | 320  | 320   | 320          | 320          | 160            | 20         |
|                | 55             | 640               | 640   | 320  | 320   | 160          | 320          | 80             | 40         |
| 56             | 2560           | 5120              | 640   | 1280 | 640   | 640          | 320          | 80             |            |
| 57             | 320            | 640               | 160   | 640  | 160   | 320          | 80           | 20             |            |

**Table S6. pVN<sub>50</sub> values of sera collected from double and triple BNT162b2-vaccinated individuals after confirmed Omicron BA.1 breakthrough infection.**

| Participant ID | pVN <sub>50</sub> |       |      |       |              |              |                |            |
|----------------|-------------------|-------|------|-------|--------------|--------------|----------------|------------|
|                | Wuhan             | Alpha | Beta | Delta | Omicron BA.1 | Omicron BA.2 | Omicron BA.4/5 | SARS-CoV-1 |
| 1*             | 960               | 1920  | 960  | 960   | 960          | 480          | 160            | 120        |
| 2*             | 960               | 1920  | 960  | 960   | 1920         | 480          | 160            | 120        |
| 3*             | 960               | 1920  | 960  | 480   | 960          | 960          | 160            | 120        |
| 4*             | 480               | 480   | 480  | 240   | 480          | 480          | 40             | 120        |
| 5*             | 240               | 480   | 240  | 120   | 480          | 120          | 40             | 5          |
| 6*             | 1920              | 1920  | 1920 | 1920  | 960          | 960          | 640            | 40         |
| 7*             | 960               | 1920  | 960  | 960   | 960          | 960          | 160            | 40         |
| 8*             | 480               | 960   | 480  | 480   | 960          | 480          | 160            | 20         |
| 9#             | 1920              | 3840  | 1920 | 1920  | 1920         | 960          | 320            | 120        |
| 10#            | 960               | 1920  | 960  | 480   | 480          | 480          | 160            | 120        |
| 11#            | 3840              | 3840  | 3840 | 3840  | 1920         | 1920         | 640            | 960        |
| 12#            | 960               | 1920  | 960  | 960   | 960          | 960          | 160            | 120        |
| 13#            | 480               | 1920  | 960  | 480   | 480          | 480          | 40             | 20         |
| 14#            | 1920              | 1920  | 960  | 960   | 960          | 1920         | 320            | 40         |
| 15#            | 960               | 1920  | 960  | 960   | 1920         | 480          | 80             | 80         |
| 16#            | 960               | 1920  | 480  | 960   | 480          | 480          | 80             | 5          |
| 17#            | 480               | 960   | 480  | 480   | 480          | 480          | 80             | 60         |
| 18#            | 1920              | 3840  | 3840 | 3840  | 3840         | 1920         | 2560           | 120        |

\*, participant received two doses of BNT162b2 prior to Omicron BA.1 infection  
 #, participant received three doses of BNT162b2 prior to Omicron BA.1 infection

**Table S7. VN<sub>50</sub> values of sera collected from Omicron-naïve double BNT162b2-vaccinated individuals.**

| Clinical trial | Participant ID | VN <sub>50</sub> |      |       |              |
|----------------|----------------|------------------|------|-------|--------------|
|                |                | Wuhan            | Beta | Delta | Omicron BA.1 |
| BNT162-01      | 19             | 226              | 5    | 20    | 5            |
|                | 20             | 320              | 14   | 80    | 5            |
|                | 21             | 226              | 5    | 40    | 5            |
|                | 22             | 905              | 28   | 80    | 7            |
|                | 23             | 640              | 113  | 226   | 10           |
|                | 24             | 320              | 14   | 20    | 5            |
|                | 25             | 453              | 28   | 80    | 14           |
|                | 26             | 1810             | 80   | 160   | 28           |
|                | 27             | 453              | 28   | 40    | 7            |
|                | 28             | 320              | 14   | 80    | 7            |
|                | 29             | 226              | 5    | 20    | 5            |
|                | 30             | 453              | 14   | 28    | 5            |
|                | 31             | 320              | 28   | 40    | 5            |
|                | 32             | 160              | 14   | 14    | 5            |
|                | 33             | 640              | 20   | 80    | 5            |
|                | 34             | 320              | 20   | 20    | 7            |
|                | 35             | 320              | 28   | 40    | 7            |
|                | 36             | 640              | 20   | 56    | 5            |
| 37             | 40             | 5                | 5    | 5     |              |
| 38             | 320            | 7                | 40   | 5     |              |

**Table S8. VN<sub>50</sub> titer values of sera collected from Omicron-naïve triple BNT162b2-vaccinated individuals.**

| Clinical trial | Participant ID | VN <sub>50</sub> titer |      |       |              |
|----------------|----------------|------------------------|------|-------|--------------|
|                |                | Wuhan                  | Beta | Delta | Omicron BA.1 |
| BNT162-17      | 39             | 226                    | 80   | 226   | 40           |
|                | 40             | 905                    | 453  | 320   | 226          |
|                | 41             | 640                    | 226  | 226   | 160          |
|                | 42             | 3620                   | 1280 | 1810  | 453          |
|                | 43             | 226                    | 226  | 160   | 40           |
|                | 44             | 226                    | 80   | 160   | 57           |
|                | 45             | 640                    | 113  | 226   | 80           |
|                | 46             | 453                    | 226  | 453   | 80           |
|                | 47             | 640                    | 226  | 226   | 160          |
|                | 48             | 160                    | 80   | 113   | 28           |
|                | 49             | 640                    | 80   | 320   | 80           |
|                | 50             | 3620                   | 905  | 1280  | 453          |
|                | 51             | 28                     | 10   | 10    | 5            |
|                | 52             | 453                    | 113  | 226   | 40           |
|                | 53             | 226                    | 113  | 226   | 57           |
|                | 54             | 905                    | 160  | 453   | 160          |
|                | 55             | 1280                   | 160  | 226   | 113          |
|                | 56             | 3620                   | 905  | 1810  | 1280         |
|                | 57             | 905                    | 226  | 320   | 80           |

**Table S9. VN<sub>50</sub> titer values of sera collected from double and triple BNT162b2-vaccinated individuals after confirmed Omicron BA.1 breakthrough infection.**

| Participant ID | VN <sub>50</sub> titer |      |       |              |
|----------------|------------------------|------|-------|--------------|
|                | Wuhan                  | Beta | Delta | Omicron BA.1 |
| 1*             | 453                    | 453  | 453   | 640          |
| 2*             | 640                    | 905  | 1280  | 640          |
| 3*             | 453                    | 640  | 320   | 640          |
| 4*             | 160                    | 453  | 226   | 320          |
| 5*             | 80                     | 113  | 160   | 453          |
| 6*             | 1280                   | 905  | 1280  | 640          |
| 7*             | 905                    | 905  | 640   | 453          |
| 8*             | 226                    | 320  | 320   | 320          |
| 9#             | 453                    | 1280 | 1280  | 640          |
| 10#            | 453                    | 640  | 640   | 453          |
| 11#            | 1810                   | 1810 | 2560  | 1810         |
| 12#            | 453                    | 905  | 1280  | 453          |
| 13#            | 640                    | 640  | 320   | 453          |
| 14#            | 640                    | 640  | 905   | 640          |
| 15#            | 320                    | 640  | 453   | 453          |
| 16#            | 905                    | 226  | 453   | 226          |

\*, participant received two doses of BNT162b2 prior to Omicron BA.1 infection

#, participant received three doses of BNT162b2 prior to Omicron BA.1 infection



**Table S10. Individuals vaccinated with other approved COVID-19 vaccines or mixed regimens after subsequent Omicron breakthrough infection.**

| Participant ID | YOB  | Sex | Vaccination           | Omicron subtype | Dose 1-2 interval | Dose 2-3 interval | Positive test after last vaccination | Blood draw after positive test | Severity (WHO grade) |
|----------------|------|-----|-----------------------|-----------------|-------------------|-------------------|--------------------------------------|--------------------------------|----------------------|
| 58             | 1960 | f   | AZ/BNT                | n/a             | 62                | N/A               | 142                                  | 46                             | 1-2                  |
| 59             | 1955 | m   | AZ/BNT                | n/a             | 68                | N/A               | 135                                  | 45                             | 1-2                  |
| 60             | 1983 | m   | J&J                   | n/a             | N/A               | N/A               | 161                                  | 44                             | 1-2                  |
| 61             | 1962 | m   | MOD <sup>3</sup>      | BA.1            | 42                | 172               | 3                                    | 35                             | 1-2                  |
| 62             | 1993 | f   | MOD <sup>2</sup>      | n/a             | 42                | N/A               | 169                                  | 44                             | 1-2                  |
| 63             | 1981 | m   | J&J/BNT               | n/a             | 138               | N/A               | 45                                   | 40                             | 1-2                  |
| 64             | 1989 | m   | AZ/BNT/MOD            | BA.1            | 68                | 154               | 9                                    | 43                             | 1-2                  |
| 65             | 1994 | m   | MOD <sup>2</sup> /BNT | n/a             | 28                | 252               | 22                                   | 40                             | 1-2                  |
| 66             | 1990 | m   | MOD <sup>2</sup> /BNT | n/a             | 42                | 154               | 13                                   | 42                             | 1-2                  |
| 67             | 1972 | m   | MOD <sup>2</sup> /BNT | n/a             | 28                | 256               | 45                                   | 31                             | 1-2                  |
| <b>Median:</b> |      |     |                       |                 |                   |                   | 45                                   | 43                             |                      |

OB, year of birth; m, male; f, female; n/a, not available; N/A, not applicable;

AZ, AstraZeneca AZD1222; BNT, BioNTech/Pfizer BNT162b2; J&J, Johnson & Johnson Ad26.COV2.S; MOD, Moderna mRNA-1273; BNT<sup>4</sup>, BNT162b2 four-dose series; MOD<sup>2</sup>, mRNA-1273 two-dose series; MOD<sup>3</sup>, mRNA-1273 three-dose series

**Table S11. pVN<sub>50</sub> titer values of sera collected from individuals vaccinated with other approved COVID-19 vaccines or mixed regimens after subsequent Omicron BA.1 breakthrough infection.**

| Participant ID | pVN <sub>50</sub> titer |       |      |       |              |              |                |            |
|----------------|-------------------------|-------|------|-------|--------------|--------------|----------------|------------|
|                | Wuhan                   | Alpha | Beta | Delta | Omicron BA.1 | Omicron BA.2 | Omicron BA.4/5 | SARS-CoV-1 |
| 58             | 1920                    | 3840  | 1920 | 960   | 960          | 960          | 640            | 240        |
| 59             | 1920                    | 3840  | 960  | 1920  | 1920         | 960          | 320            | 10         |
| 60             | 120                     | 480   | 120  | 240   | 120          | 60           | 40             | 60         |
| 61             | 7680                    | 15360 | 7680 | 3840  | 15360        | 3840         | 1280           | 480        |
| 62             | 120                     | 120   | 30   | 30    | 60           | 60           | 5              | 5          |
| 63             | 480                     | 1920  | 960  | 960   | 480          | 480          | 320            | 120        |
| 64             | 480                     | 1920  | 960  | 480   | 240          | 480          | 320            | 60         |
| 65             | 480                     | 240   | 60   | 240   | 60           | 120          | 40             | 30         |
| 66             | 1920                    | 1920  | 960  | 1920  | 960          | 960          | 640            | 60         |
| 67             | 3840                    | 15360 | 7680 | 7680  | 3840         | 3840         | 2560           | 120        |

**Table S12. Frequencies of S glycoprotein/RBD-specific B<sub>MEM</sub> cells for all individuals analyzed.**

| Study              | Participant ID     | Wuhan Spike <sup>+</sup><br>B <sub>MEMS</sub> | Alpha Spike <sup>+</sup><br>B <sub>MEMS</sub> | Delta Spike <sup>+</sup><br>B <sub>MEMS</sub> | Omicron BA.1 Spike <sup>+</sup><br>B <sub>MEMS</sub> | Wuhan RBD <sup>+</sup><br>B <sub>MEMS</sub> | Alpha RBD <sup>+</sup><br>B <sub>MEMS</sub> | Delta RBD <sup>+</sup><br>B <sub>MEMS</sub> | Omicron BA.1 RBD <sup>+</sup><br>B <sub>MEMS</sub> |      |
|--------------------|--------------------|-----------------------------------------------|-----------------------------------------------|-----------------------------------------------|------------------------------------------------------|---------------------------------------------|---------------------------------------------|---------------------------------------------|----------------------------------------------------|------|
| Investigator Study | 1*                 | 3.87                                          | 3.16                                          | 3.16                                          | 3.79                                                 | 0.49                                        | 0.52                                        | 0.50                                        | 0.47                                               |      |
|                    | 2*                 | 1.09                                          | 0.88                                          | 0.94                                          | 0.98                                                 | 0.62                                        | 0.66                                        | 0.46                                        | 0.47                                               |      |
|                    | 4*                 | 0.94                                          | 0.81                                          | 0.72                                          | 1.00                                                 | 0.23                                        | 0.33                                        | 0.20                                        | 0.21                                               |      |
|                    | 5*                 | 0.71                                          | 0.54                                          | 0.63                                          | 0.78                                                 | 1.96                                        | 1.96                                        | 1.38                                        | 1.49                                               |      |
|                    | 6*                 | 2.15                                          | 1.83                                          | 1.91                                          | 2.09                                                 | 1.15                                        | 1.17                                        | 1.10                                        | 0.89                                               |      |
|                    | 7*                 | 2.57                                          | 2.09                                          | 2.25                                          | 2.53                                                 | 2.06                                        | 2.13                                        | 1.86                                        | 1.59                                               |      |
|                    | 8*                 | 0.45                                          | 0.33                                          | 0.34                                          | 0.62                                                 | 0.21                                        | 0.26                                        | 0.21                                        | 0.21                                               |      |
|                    | 11 <sup>#</sup>    | 0.73                                          | 0.73                                          | 0.93                                          | 0.90                                                 | 0.37                                        | 0.29                                        | 0.23                                        | 0.34                                               |      |
|                    | 12 <sup>#</sup>    | 1.38                                          | 1.34                                          | 1.86                                          | 1.87                                                 | 1.12                                        | 0.93                                        | 0.72                                        | 1.06                                               |      |
|                    | 13 <sup>#</sup>    | 1.67                                          | 1.65                                          | 2.15                                          | 2.05                                                 | 1.12                                        | 0.94                                        | 0.68                                        | 1.06                                               |      |
|                    | 14 <sup>#</sup>    | 1.35                                          | 1.33                                          | 1.68                                          | 1.62                                                 | 0.94                                        | 0.75                                        | 0.72                                        | 0.91                                               |      |
|                    | 15 <sup>#</sup>    | 2.75                                          | 2.77                                          | 3.40                                          | 3.11                                                 | 2.53                                        | 2.22                                        | 1.68                                        | 2.41                                               |      |
|                    | 16 <sup>#</sup>    | 0.58                                          | 0.61                                          | 0.82                                          | 0.73                                                 | 0.50                                        | 0.44                                        | 0.29                                        | 0.42                                               |      |
|                    | BNT162-01<br>Early | 35                                            | 0.28                                          | 0.18                                          | 0.19                                                 | 0.27                                        | 0.11                                        | 0.12                                        | 0.13                                               | 0.05 |
|                    |                    | 38                                            | 0.33                                          | 0.18                                          | 0.25                                                 | 0.29                                        | 0.08                                        | 0.09                                        | 0.09                                               | 0.03 |
|                    |                    | 41                                            | 0.19                                          | 0.13                                          | 0.14                                                 | 0.18                                        | 0.05                                        | 0.08                                        | 0.07                                               | 0.04 |
| 47                 |                    | 0.31                                          | 0.20                                          | 0.16                                          | 0.31                                                 | 0.07                                        | 0.10                                        | 0.08                                        | 0.02                                               |      |
| 69                 |                    | 0.19                                          | 0.16                                          | 0.16                                          | 0.18                                                 | 0.07                                        | 0.11                                        | 0.08                                        | 0.04                                               |      |
| 70                 |                    | 0.59                                          | 0.39                                          | 0.45                                          | 0.44                                                 | 0.23                                        | 0.26                                        | 0.19                                        | 0.15                                               |      |
| 71                 |                    | 0.52                                          | 0.37                                          | 0.46                                          | 0.46                                                 | 0.16                                        | 0.23                                        | 0.17                                        | 0.07                                               |      |
| BNT162-01<br>Late  | 38                 | 0.86                                          | 0.87                                          | 1.17                                          | 1.27                                                 | 0.46                                        | 0.35                                        | 0.23                                        | 0.39                                               |      |
|                    | 41                 | 0.37                                          | 0.39                                          | 0.67                                          | 0.60                                                 | 0.23                                        | 0.18                                        | 0.12                                        | 0.18                                               |      |
|                    | 69                 | 0.31                                          | 0.36                                          | 0.55                                          | 0.47                                                 | 0.18                                        | 0.13                                        | 0.06                                        | 0.09                                               |      |
|                    | 70                 | 1.97                                          | 2.05                                          | 2.67                                          | 2.65                                                 | 0.68                                        | 0.55                                        | 0.44                                        | 0.66                                               |      |
|                    | 71                 | 1.14                                          | 1.27                                          | 1.71                                          | 1.64                                                 | 0.43                                        | 0.28                                        | 0.17                                        | 0.31                                               |      |
| BNT162-14          | 72                 | 0.96                                          | 0.75                                          | 0.75                                          | 0.89                                                 | 0.30                                        | 0.35                                        | 0.27                                        | 0.15                                               |      |
|                    | 73                 | 0.62                                          | 0.44                                          | 0.45                                          | 0.62                                                 | 0.23                                        | 0.26                                        | 0.28                                        | 0.16                                               |      |
|                    | 74                 | 1.92                                          | 1.35                                          | 1.55                                          | 1.48                                                 | 0.62                                        | 0.62                                        | 0.59                                        | 0.50                                               |      |
|                    | 75                 | 1.36                                          | 1.06                                          | 0.94                                          | 1.25                                                 | 0.41                                        | 0.47                                        | 0.40                                        | 0.25                                               |      |
|                    | 76                 | 2.01                                          | 1.58                                          | 1.58                                          | 1.86                                                 | 0.64                                        | 0.68                                        | 0.62                                        | 0.49                                               |      |

\* , subject received two doses of BNT162b2 prior to Omicron BA.1 infection

# , subject received three doses of BNT162b3 prior to Omicron BA.1 infection

**Table S13. Statistical analysis corresponding to Figure 4 c-g; nonparametric Friedman test with Dunn's multiple comparisons correction**

| <b>Figure</b> | <b>Group tested</b>               | <b>p value (Shared vs. Wuhan)</b>         | <b>p value (Shared vs. Omi BA.1)</b>         |
|---------------|-----------------------------------|-------------------------------------------|----------------------------------------------|
| <b>4c</b>     | BNT162b2 <sup>2</sup> early (n=7) | >0.9999                                   | 0.1647                                       |
|               | BNT162b2 <sup>2</sup> late (n=5)  | 0.0089                                    | 0.1156                                       |
|               | BNT162b2 <sup>2</sup> + Omi (n=7) | 0.0066                                    | 0.0151                                       |
|               | BNT162b2 <sup>3</sup> (n=5)       | 0.164                                     | 0.0053                                       |
|               | BNT162b2 <sup>3</sup> + Omi (n=6) | 0.003                                     | 0.0866                                       |
| <b>4d</b>     | BNT162b2 <sup>2</sup> early (n=7) | 0.8454                                    | 0.0027                                       |
|               | BNT162b2 <sup>2</sup> late (n=5)  | 0.2277                                    | 0.0031                                       |
|               | BNT162b2 <sup>2</sup> + Omi (n=7) | 0.1227                                    | 0.0004                                       |
|               | BNT162b2 <sup>3</sup> (n=5)       | >0.9999                                   | 0.0187                                       |
|               | BNT162b2 <sup>3</sup> + Omi (n=6) | 0.1665                                    | 0.0011                                       |
| <b>Figure</b> | <b>Group tested</b>               | <b>p value (All 4 +ve vs. Only Wuhan)</b> | <b>p value (All 4 +ve vs. Only Omi BA.1)</b> |
| <b>4f</b>     | BNT162b2 <sup>2</sup> early (n=7) | 0.3629                                    | >0.9999                                      |
|               | BNT162b2 <sup>2</sup> late (n=5)  | 0.0031                                    | 0.2277                                       |
|               | BNT162b2 <sup>2</sup> + Omi (n=7) | 0.0004                                    | 0.1227                                       |
|               | BNT162b2 <sup>3</sup> (n=5)       | 0.0089                                    | 0.1156                                       |
|               | BNT162b2 <sup>3</sup> + Omi (n=6) | 0.0011                                    | 0.1665                                       |
| <b>4g</b>     | BNT162b2 <sup>2</sup> early (n=7) | >0.9999                                   | 0.0066                                       |
|               | BNT162b2 <sup>2</sup> late (n=5)  | 0.0797                                    | 0.0144                                       |
|               | BNT162b2 <sup>2</sup> + Omi (n=7) | 0.0066                                    | 0.0151                                       |
|               | BNT162b2 <sup>3</sup> (n=5)       | 0.2277                                    | 0.0031                                       |
|               | BNT162b2 <sup>3</sup> + Omi (n=6) | 0.0418                                    | 0.0078                                       |
